# Supplementary material
Source: publisher figshare collection journal article supplement (https://gsajournals.figshare.com/ndownloader/files/28005657)
Supplement: Supplementary file 1 [file 28005657]

## Sheet: Sheet1
Table S3 Primers used
Primer name	Sequence	Experiment
D𝛽1_sgRNA_5'UTR	TATATAGGAAAGATATCCGGGTGAACTTCGAAAGCTCTCTCATTTCTAAAGGGTTTTAGAGCTAGAAATAGCAAG	CRISPR
D𝛽1_sgRNA_1	ATTTTAACTTGCTATTTCTAGCTCTAAAACTAGTCGGCCTCATCCCACTGCGACGTTAAATTGAAAATAGGTC	CRISPR
D𝛽1_sgRNA_2	ATTTTAACTTGCTATTTCTAGCTCTAAAACTCCTATTCATGAAGCGCCCTCGACGTTAAATTGAAAATAGGTC	CRISPR
D𝛽1_sgRNA_5'UTR_HMA_F	ACAGCTGATAGGGCCAACTG	CRISPR
D𝛽1_sgRNA1_HMA_R	GTCCGGCTTCCAAACCTT	CRISPR
D𝛽1_sgRNA2_HMA_R	CTGATATGCTTGGGCAGCTC	CRISPR
Vermillion_F	ATCACTTGAGGTGAAAGTGC	CRISPR
25709_External_R1	CTTGAAGCTTTGGGCTTTTG	CRISPR, AttP40 insertions
SV40	CCCCCTGAACCTGAAACATA	AttP40 insertions
PcaryPuni_F	GTTTAGAGCAGCCGAAT	AttP40 insertions
D𝛽1_clone_F	CATGTCCCTGGAGTAAGTG	Cloning D𝛽1
D𝛽1_clone_R	CTGCTCCAAGTCCTCACTC	Cloning D𝛽1
D𝛽1_RT_F	GAGTTCATTGCCGAGCACTT	qRT-PCR
D𝛽1_RT_R	AAATCTCGATGATGCGATCC	qRT-PCR
CCAP_RT_F	TACAATGGAAGTACGAGAAGC	qRT-PCR
CCAP_RT_R	GCGTTTGAATAGCGAGAAT	qRT-PCR
bursiconA_RT_F (bursicon)	CTTGGCGACGATTGTCAGGT	qRT-PCR
bursiconA_RT_R	GGGACAGAATAGCGAGACGG	qRT-PCR
bursiconB_RT_F (partner of bursicon)	GGCACTGGCGACGAGAACTG	qRT-PCR
bursiconB_RT_R	GGCAGCAGTAGCACTCTTTCAG	qRT-PCR
Rp32_ RT_F	CCAGTCGGATCGATATGCTAA	qRT-PCR
Rp32_RT_R	GTTCGATCCGTAACCGATGT	qRT-PCR
CG13220_RT_F	TGGGCAGTGCCTTCTACATTT	qRT-PCR
CG13220_RT_R	CGTACGCACCTCGCTTGTT	qRT-PCR
